# Stochastic dynamics of consumer-resource interactions

Abhyudai Singh<sup>1</sup>

## Abstract

The interaction between a consumer (such as, a predator or a parasitoid) and a resource (such as, a prey or a host) forms an integral motif in ecological food webs, and has been modeled since the early 20<sup>th</sup> century starting from the seminal work of Lotka and Volterra. While the Lotka-Volterra predator-prey model predicts a neutrally stable equilibrium with oscillating population densities, a density-dependent predator attack rate is known to stabilize the equilibrium. Here, we consider a stochastic formulation of the Lotka-Volterra model where the prey's reproduction rate is a random process, and the predator's attack rate depends on both the prey and predator population densities. Analysis shows that increasing the sensitivity of the attack rate to the prey density attenuates the magnitude of stochastic fluctuations in the population densities. In contrast, these fluctuations vary non-monotonically with the sensitivity of the attack rate to the predator density with an optimal level of sensitivity minimizing the magnitude of fluctuations. Interestingly, our systematic study of the predator-prey correlations reveals distinct signatures depending on the form of the density-dependent attack rate. In summary, stochastic dynamics of nonlinear Lotka-Volterra models can be harnessed to infer density-dependent mechanisms regulating consumer-resource interactions. Moreover, these mechanisms can have contrasting consequences on population fluctuations, with predator-dependent attack rates amplifying stochasticity, while prey-dependent attack rates countering to buffer fluctuations.

## I. INTRODUCTION

Consumer-resource dynamics has been traditionally studied using an ordinary differential equation framework starting from the seminal work of Lotka and Volterra over a century ago [1]–[7]. The classical Lotka-Volterra model

$$\frac{dh(t)}{dt} = rh(t) - ch(t)p(t) \quad (1a)$$

$$\frac{dp(t)}{dt} = ch(t)p(t) - \gamma p(t) \quad (1b)$$

captures the dynamics of a predator-prey system, where  $h(t)$  and  $p(t)$  are the average population densities (number of individuals per unit area) of the prey (i.e., the resource), and the predator (i.e., the consumer), at time  $t$ . Here  $r$  represents the prey's growth rate and  $h(t)$  grows exponentially over time in the absence of the predator. Predators consume prey with rate  $c$  that we refer to as the *attack rate*, and each attacked prey leads to a new predator. Finally, each predator dies at a rate  $\gamma$ . In addition to predator-prey systems, ecological examples of such consumer-resource dynamics include host-parasitoid interactions that have tremendous application in biological control of pest species [8]–[15]. In a typical interaction, parasitoid wasps search and attack their host insect species by laying an egg within the body of the host. The egg hatches into a juvenile parasitoid that develops within the host by eating it from the inside out. Once fully developed, the parasitoid emerges from the dead host to repeat the life cycle.

The steady-state prey and predator equilibrium densities corresponding to the Lotka-Volterra model (1) are given by

$$h^* = \frac{\gamma}{c}, \quad p^* = \frac{r}{c}, \quad (2)$$

respectively. It turns out that this equilibrium is neutrally stable resulting in cycling population densities with a period of  $2\pi/\sqrt{r\gamma}$  (assuming perturbations around the equilibrium) [16], and such population cycles have fascinated theoretical ecologists with several interpretations/extensions [17]–[19]. There is a rich body of literature expanding the Lotka-Volterra model to understand how diverse processes can push the equilibrium towards stability or instability [20]–[29]. For example, self-limitation in the prey's growth in the form of a carrying capacity stabilizes the equilibrium [16]. Interestingly, a wide class of two-dimensional consumer-resource models with an unstable equilibrium result in a stable limit cycle [30], [31].

<sup>1</sup>Abhyudai Singh is with the Departments of Electrical and Computer Engineering, Biomedical Engineering and Mathematical Sciences, University of Delaware, Newark, DE 19716, USA [absingh@udel.edu](mailto:absingh@udel.edu)

In this contribution, we focus on generalizing (1) to

$$\frac{dh(t)}{dt} = rh(t) - f(h,p)h(t)p(t) \quad (3a)$$

$$\frac{dp(t)}{dt} = f(h,p)h(t)p(t) - \gamma p(t) \quad (3b)$$

that considers a density-dependent attack rate  $f(h,p)$ , where  $f$  is a continuously differentiable function in both arguments. A generalized attack rate encompasses a wide range of ecological mechanisms. At one end of the spectrum are prey-dependent attack rates that capture nonlinear functional responses. For a Type II functional response

$$f = \frac{c_1}{1 + c_1 T_h h} \quad (4)$$

is a decreasing function of the prey density, where  $c_1 > 0$  is the attack rate at small prey densities and  $T_h$  is the handling time [32]–[34]. Basically, the total attack rate per predator  $f(h,p)h$  increases linearly with  $h$  at low prey densities, but saturates to  $1/T_h$  at high prey densities. Similarly, a Type III functional response corresponds to a sigmoidal function

$$f = \frac{c_{max} h^q}{1 + c_{max} T_h h^{q+1}}, \quad q \geq 1 \quad (5)$$

that initially accelerates with increasing prey density and then saturates to  $1/T_h$ . At the other end of the spectrum are predator-dependent attack rates. For example, a decreasing attack rate with increasing predator density implies mutual interference between predators [35]–[38], or aggregation of predators to a subpopulation of high-risk individuals [39]–[43]. In contrast, cooperation between predators is reflected in  $f$  increasing with predator density.

In this contribution we provide analytical conditions for having a stable population dynamics in terms of the sensitivity of  $f$  to prey/predator densities, thus combining the impact of different mechanisms into a single generalized stability criterion. Furthermore, we consider a stochastic formulation of the model by allowing the prey's growth rate to follow a OrnsteinUhlenbeck random process that drives the deterministic predator-prey dynamics (3). We systematically investigate how random fluctuations in the prey's growth rate propagate to population densities and uncover mechanisms that amplify or attenuate these fluctuations.

## II. STABILITY ANALYSIS OF THE GENERALIZED LOTKA-VOLTERRA MODEL

Setting the left-hand-side of (3) to zero, the equilibrium population densities  $h^*$  and  $p^*$  of the generalized Lotka-Volterra model are the solution to

$$f(h^*, p^*) = \frac{r}{p^*}, \quad p^* = \frac{r h^*}{\gamma}. \quad (6)$$

We assume that the function form of  $f$  is such that (6) yields a *unique* non-trivial equilibrium. Before performing a local stability analysis around the equilibrium, we define two dimensionless log sensitivities

$$f_h := \frac{h^*}{f(h^*, p^*)} \frac{\partial f(h,p)}{\partial h} \Big|_{h=h^*, p=p^*}, \quad \text{log sensitivity of the attack rate } f(h,p) \text{ to the prey density}$$

$$f_p := \frac{p^*}{f(h^*, p^*)} \frac{\partial f(h,p)}{\partial p} \Big|_{h=h^*, p=p^*}, \quad \text{log sensitivity of the attack rate } f(h,p) \text{ to the predator density}$$

where  $\frac{h^*}{f(h^*, p^*)} \frac{\partial f(h,p)}{\partial h} \Big|_{h=h^*, p=p^*}$  is the partial derivative of  $f$  with respect to  $h$  evaluated at the equilibrium. To be biology realistic, we assume that  $f(h,p)p$  is an increasing function of the predator density that constrains  $f_p > -1$ , i.e., the decrease in  $f$  with increasing  $p$  cannot be faster than  $1/p$ .

Linearizing the right-hand-side of (3) around the equilibrium yields the following Jacobian matrix

$$A = \begin{bmatrix} -r f_h & -f_p \gamma - \gamma \\ r f_h + r & \gamma f_p \end{bmatrix}, \quad (7)$$

and stability requires a Hurwitz matrix whose eigenvalues have negative real parts [44], [45]. For a two-dimensional system, the equilibrium is asymptotically stable, if and only if, the determinant of the  $A$  matrix is positive and its

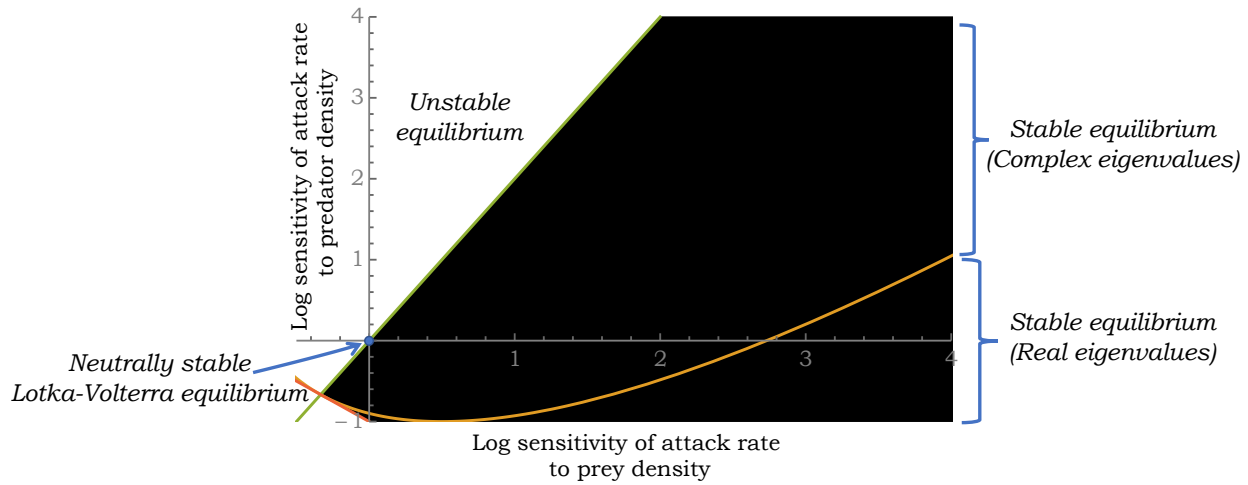

Fig. 1: The black shaded region represents the region of stability for the equilibrium of the generalized Lotka-Volterra model (3). The stability criterion (10) is plotted in terms of the log sensitivities of the attack rate  $f(h, p)$  to the prey ( $f_h$ ) and predator ( $f_p$ ) densities. The yellow line within the stability region separates the regions of negative real eigenvalue of the Jacobian matrix and complex eigenvalues with negative real parts. For this plot, the prey's growth rate is assumed to be  $r = 2$  per unit time and  $\gamma = 1$  per unit time.

trace is negative [44], [45]. This implies that the equilibrium obtained as the solution to (6) is asymptotically stable, if and only if, both these inequalities hold

$$f_p < \frac{rf_h}{\gamma}, \quad 1 + f_h + f_p > 0. \quad (8)$$

The black shaded region in Fig. 1 shows the stability region as a function of the log sensitivities  $f_p$  and  $f_h$ , with the neutrally stable Lotka-Volterra equilibrium corresponding to  $f_p = f_h = 0$  on the edge of stability. Moreover, the intersection of the two lines in Fig. 1 reveals

$$f_h > -\frac{1}{1 + \frac{r}{\gamma}} \quad (9)$$

as a necessary condition for stability. These stability conditions for continuous-time consumer-resource models are analogous counterparts to recently developed stability conditions for discrete-time consumer-resource models [46], [47].

It's clear from the Fig. 1 that as reported in previous analysis [48], a Type II functional response with  $f_h < 0$  and  $f_p = 0$  will lead to an unstable equilibrium. In contrast,  $f_h > 0$  and  $f_p = 0$  stabilizes the equilibrium. As discussed earlier,  $f_h > 0$  arises in the initial phase of a Type III functional response where the predator attack rate accelerates with increasing prey density. Interestingly, a Type II functional response ( $f_h < 0$ ) can provide stability in a narrow range if combined with other mechanisms, such as mutual interference between predators where  $f_p < 0$ . Overall these results show that an attack rate that increases with prey-density is sufficient to stabilize the equilibrium as long as  $-1 < f_p < r * f_h$ . Similarly, a predator-dependent attack rate with  $f_h = 0$  and  $-1 < f_p < 0$  is sufficient to stabilize the equilibrium. Finally, we point out that the line

$$\left(f_p - \frac{rf_h}{\gamma}\right)^2 = \frac{4r(1 + f_h + f_p)}{\gamma} \quad (10)$$

divides the stability region into two parts – negative real eigenvalues of the Jacobian matrix below the line, and complex eigenvalues with negative real parts above the line. With increasing  $r$ , the line shifts further to the left. This separation within the stability region is relevant in the stochastic formulation of the model, where a stable

equilibrium with complex eigenvalues of the  $A$  matrix can yield signatures of oscillatory dynamics in the presence of noise.

### III. STOCHASTIC FORMULATION OF THE GENERALIZED LOTKA-VOLTERRA MODEL

Having determined the stability regions of the deterministic model (3), we next turn our attention to the stochastic formulation of this model. In this context, much prior work has studied demographic stochasticity arising at low population abundances using Lotka-Volterra and spatial predator-prey models [44], [49]–[54]. Here, we focus on environmental stochasticity that arises through randomness in the prey's growth rate. Towards that end, we let the prey's growth rate  $r(t)$  evolve as per an Ornstein-Uhlenbeck (OU) process

$$dr(t) = \gamma_r(r^* - r(t))dt + \sigma dw(t) \quad (11)$$

where  $w(t)$  is the Wiener process and  $r^*$  is the mean level of  $r(t)$ . By using an OU process we capture memory in growth-rate fluctuations, with parameters  $\gamma_r > 0$  and  $\sigma > 0$  characterizing the time-scale and magnitude of  $r(t)$  fluctuations, respectively. These growth-rate fluctuations in turn drive population-density fluctuations through the model

$$dh(t) = r(t)h(t)dt - f(h, p)h(t)p(t)dt \quad (12a)$$

$$dp(t) = f(h, p)h(t)p(t)dt - p(t)dt. \quad (12b)$$

Before describing mathematical tools for quantifying statistical moments of population densities, we point out that our approach of incorporating environmental stochasticity is different to other works that have considered either seasonal deterministic variations in  $r(t)$  [44], [55] or have added memoryless Brownian noise terms to the deterministic population dynamics [56]–[59].

To obtain the time evolution of the statistical moments of  $r(t)$ ,  $h(t)$  and  $p(t)$  corresponding to the nonlinear stochastic dynamical system (11)-(12) we use the following result. For any continuously differentiable function  $\psi(r, h, p)$ , its expected value evolves as

$$\frac{d\langle \psi(r, h, p) \rangle}{dt} = \left\langle \frac{\partial \psi}{\partial r} \gamma_r (r^* - r) + \frac{1}{2} \frac{\partial^2 \psi}{\partial^2 r} \sigma^2 + \frac{\partial \psi}{\partial h} (rh - f(h, p)hp) + \frac{\partial \psi}{\partial p} (f(h, p)hp - p) \right\rangle, \quad (13)$$

and moment dynamics is obtained by simply using a monomial

$$\psi(r, h, p) = r^{m_1} h^{m_2} p^{m_3}, \quad m_1, m_2, m_3 \in \{0, 1, 2, \dots\} \quad (14)$$

in (13) [60]. Throughout the manuscript we use  $\langle \cdot \rangle$  to denote the expected value operation. For example, taking  $m_1 = 1$  or 2 with  $m_2 = m_3 = 0$  yields the time evolution of the first two statistical moments of  $r(t)$

$$\frac{d\langle r \rangle}{dt} = \gamma_r (r^* - \langle r \rangle) \quad (15a)$$

$$\frac{d\langle r^2 \rangle}{dt} = 2\gamma_r (r^* \langle r \rangle - \langle r^2 \rangle) + \sigma^2 \quad (15b)$$

that result in the following steady-state mean and variance

$$\lim_{t \rightarrow \infty} \langle r \rangle = r^* \quad (16a)$$

$$\sigma_r^2 := \lim_{t \rightarrow \infty} \langle r^2 \rangle - \langle r \rangle^2 = \frac{\sigma^2}{2\gamma_r}, \quad (16b)$$

respectively. Similarly, to derive the mean dynamics of the prey's population density we use  $m_2 = 1$ ,  $m_1 = m_3 = 0$  to obtain

$$\frac{d\langle h \rangle}{dt} = \langle rh \rangle - \langle f(h, p)hp \rangle, \quad (17)$$

where the right-hand-side now consists of higher-order moments. This problem of unclosed moment dynamics, where the time evolution of lower-order moments depends on higher-order moments has been well described for

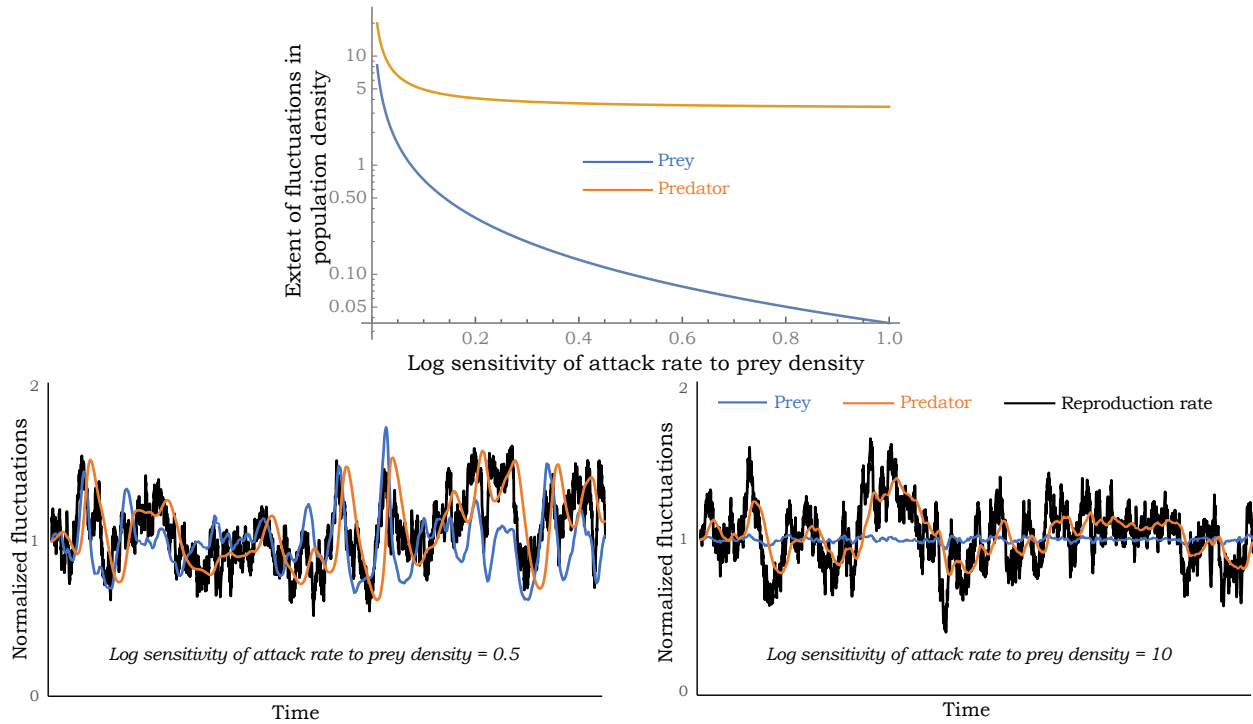

Fig. 2: Noise in the fluctuations of population densities as determined by (25) plotted for increasing  $f_h$  for  $f_p = 0$ . Stochastic realizations of the prey's growth rate, population densities of the prey and the predator are shown for  $f_h = 0.5$  (left) and  $f_h = 10$  (right). Note that for large values of  $f_h$  fluctuations in the predator density remain pronounced even though fluctuations in the prey density are minimal. For this plot,  $\hat{r}^* = 1/3$ ,  $\hat{\gamma}_r = 6$ ,  $CV_r^2 = 0.75$

nonlinear stochastic systems, and often arises in the modeling of biochemical and ecological processes [15], [61]–[77]. Typically, different closure schemes are employed to approximate moment dynamics and we use one such approach known as the Linear Noise Approximation (LNA) [78]–[82]. In essence, assuming a stable equilibrium  $(h^*, p^*)$  in the deterministic formulation as given by (replacing  $r$  by  $r^*$  in (6))

$$f(h^*, p^*) = \frac{r^*}{p^*}, \quad p^* = \frac{rh^*}{\gamma}, \quad (18)$$

then for small fluctuations in  $r(t)$ ,  $h(t)$ ,  $p(t)$  around their respective equilibriums, the model nonlinearities can be linearized as

$$rh \approx rh^* + r^*h - r^*h^* \quad (19a)$$

$$f(h, p)hp \approx r^*h^* \left( 1 + (1 + f_h) \frac{h - h^*}{h^*} + (1 + f_p) \frac{p - p^*}{p^*} \right). \quad (19b)$$

Moment dynamics is then derived after replacing these linear approximations in place of their nonlinear terms in (13) resulting in a closed system – the time derivative of a second-order moment now only depends on moments of order up to two. More specifically, if we collect all the first and second-order moments within the vector

$$\boldsymbol{\mu} = [\langle r \rangle, \langle h \rangle, \langle p \rangle, \langle r^2 \rangle, \langle h^2 \rangle, \langle p^2 \rangle, \langle rh \rangle, \langle rp \rangle, \langle hp \rangle]^T, \quad (20)$$

then it's time evolution is given by a linear time-invariant system

$$\frac{d\boldsymbol{\mu}}{dt} = \hat{a} + A_\mu \boldsymbol{\mu} \quad (21)$$

for some  $\hat{a}$  and matrix  $A_\mu$ . Solving this linear system at steady-state quantifies the magnitude of fluctuations in the population densities.

#### IV. RESULTS AND DISCUSSION

In the previous section, we described a LNA-based approach to quantify the statistical moments of population densities. Here we present some of the key results and insights from the analysis of moments. We quantify noise in the random processes  $r(t)$ ,  $h(t)$ ,  $p(t)$  using the square of their respective coefficient of variations

$$CV_r^2 := \lim_{t \rightarrow \infty} \frac{\langle r^2 \rangle - \langle r \rangle^2}{\langle r \rangle^2} \quad (22a)$$

$$CV_h^2 := \lim_{t \rightarrow \infty} \frac{\langle h^2 \rangle - \langle h \rangle^2}{\langle h \rangle^2} \quad (22b)$$

$$CV_p^2 := \lim_{t \rightarrow \infty} \frac{\langle p^2 \rangle - \langle p \rangle^2}{\langle p \rangle^2}. \quad (22c)$$

Solving (21) in in Mathematica [83] yields the following analytical expressions for the noise in the prey and the predator population densities (normalized by the noise in the prey's growth rate)

$$\frac{CV_h^2}{CV_r^2} = \frac{\hat{r}^* ((\hat{\gamma}_r - f_p) f_p^2 + f_h f_p^2 \hat{r}^* + \hat{\gamma}_r (1 + f_h + f_p) \hat{r}^*)}{(1 + f_h + f_p)(f_h \hat{r}^* - f_p) (\hat{\gamma}_r (\hat{\gamma}_r - f_p) + (1 + f_h + \hat{\gamma}_r f_h + f_p) \hat{r}^*)} \quad (23a)$$

$$\frac{CV_p^2}{CV_r^2} = \frac{\hat{r}^* (1 + f_h)^2 (\hat{\gamma}_r - f_p + f_h \hat{r}^*)}{(1 + f_h + f_p)(f_h \hat{r}^* - f_p) (\hat{\gamma}_r (\hat{\gamma}_r - f_p) + (1 + f_h + \hat{\gamma}_r f_h + f_p) \hat{r}^*)}, \quad (23b)$$

respectively, and they depend on four dimensionless parameters - the sensitivity of the attack rate to the prey density ( $f_h$ ), the sensitivity of the attack rate to the predator density ( $f_p$ ), the prey's average growth rate and the time-scale of fluctuations in  $r(t)$  normalized by the predator's death rate

$$\hat{r}^* = \frac{r^*}{\gamma}, \quad \hat{\gamma}_r = \frac{\gamma_r}{\gamma}. \quad (24)$$

Recall from (10) that the stability of the deterministic equilibrium constrains  $f_h$  and  $f_p$  in the stability region of Fig. 1 which ensures positivity of noise levels. Moreover, as one gets closer to the Lotka-Volterra model ( $f_h \rightarrow 0$  and  $f_p \rightarrow 0$ ), the system approaches the stability boundary leading to ( $CV_h^2 \rightarrow \infty$  and  $CV_p^2 \rightarrow \infty$ ) in the LNA framework of noise derivation.

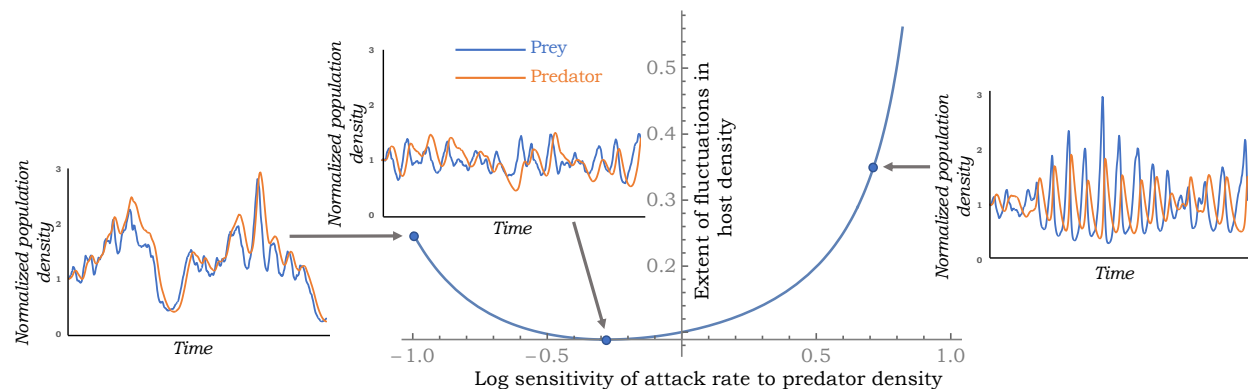

Fig. 3: Noise in the fluctuations of prey density  $CV_h^2$  as determined by (23) plotted as a function of  $f_p$ . Noise is minimized at an intermediate value of  $f_p$  and stochastic realizations of the prey and predator densities are shown for three different values of  $f_p$ . For this plot,  $\hat{r}^* = 2$ ,  $f_h = 0.5$ ,  $\sigma = 1$  and  $\hat{\gamma}_r = 1$ .

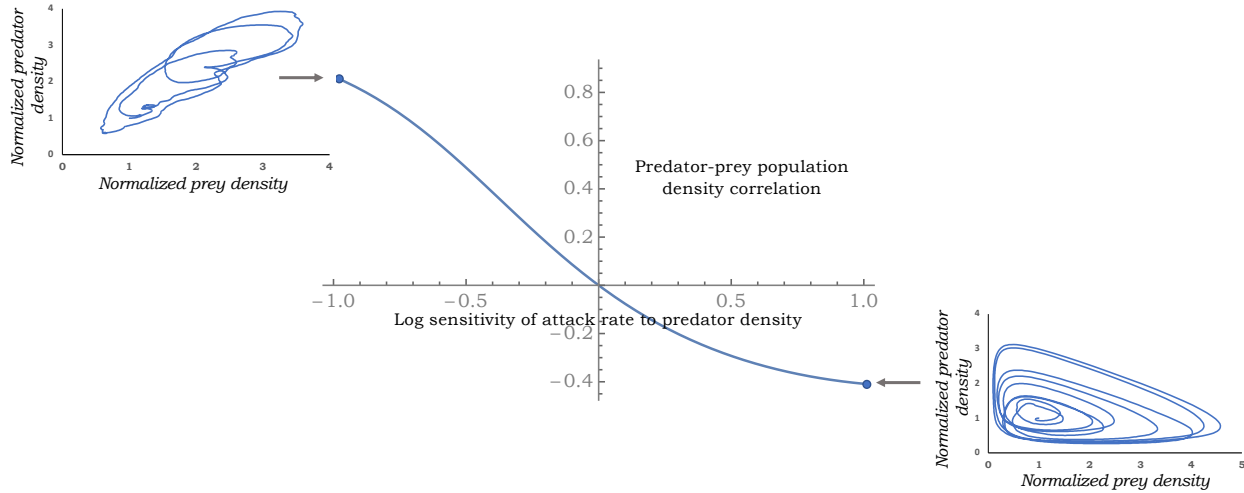

Fig. 4: Pearson's correlation coefficient between the predator and the prey population densities as predicted by (31) for varying levels of  $f_p$  with  $f_p < 0$  ( $f_p > 0$ ) driving a positive (negative) correlation. Sample trajectory paths are shown for  $f_p = 1$  and  $f_p = -1$ . Other parameters taken as  $\hat{r}^* = 2$ ,  $f_h = 0.6$  and  $\hat{\gamma}_r = 1$ .

For an attack rate that only depends on the prey's density ( $f_p = 0$ ), (23) reduces to

$$\frac{CV_h^2}{CV_r^2} = \frac{\hat{\gamma}_r \hat{r}^*}{f_h (\hat{\gamma}_r^2 + \hat{r}^* + f_h \hat{r}^* (1 + \hat{\gamma}_r))} \quad (25a)$$

$$\frac{CV_p^2}{CV_r^2} = \frac{(1 + f_h)(\hat{\gamma}_r + f_h \hat{r}^*)}{f_h (\hat{\gamma}_r^2 + \hat{r}^* + f_h \hat{r}^* (1 + \hat{\gamma}_r))} \quad (25b)$$

and fluctuations in population densities monotonically decrease with increasing dependence of the attack rate on the prey's density (Fig. 2). Interestingly, while

$$\lim_{f_h \rightarrow \infty} \frac{CV_h^2}{CV_r^2} = 0 \quad (26)$$

the noise in the predator's abundance approached a non-zero limit illustrating noise propagation of growth-rate fluctuations to the predator density via the prey.

$$\lim_{f_h \rightarrow \infty} \frac{CV_p^2}{CV_r^2} = \frac{1}{1 + \hat{\gamma}_r}. \quad (27)$$

Our analysis further shows that when  $\hat{r}^* < 1$ , then  $CV_p^2 > CV_h^2$ . In contrast, when  $\hat{r}^* > 1$ , then  $CV_p^2 < CV_h^2$  for small value of  $f_h$ , and  $CV_p^2 > CV_h^2$  beyond a critical value  $f_h$ . One observation from the equilibrium analysis in (18) is that for a prey-dependent attack rate,  $h^*$  is independent of  $r^*$  implying that if the prey's growth rate is chosen from a static distribution then it will not create any fluctuations in the preys' density. This can be seen in (25) where in the limit

$$\lim_{\hat{\gamma}_r \rightarrow 0} CV_h^2 = 0. \quad (28)$$

However, as  $p^*$  is linearly dependent of  $r^*$

$$\lim_{\hat{\gamma}_r \rightarrow 0} CV_p^2 = CV_r^2. \quad (29)$$

While fluctuations in population densities monotonically decrease with increasing  $f_h$ , the impact of a predator-dependent attack rate is quite different with noise levels varying non-monotonically with  $f_p$  (Fig. 3). This effect can

be understood in term of the stability region in Fig. 1, where for a given  $f_h > 0$  stability requires  $-1 - f_h < f_p < r^* f_h$ , and increasing  $f_p$  on either side puts the system closer to the stability boundary amplifying random fluctuations. This results in a scenario where fluctuations in population densities are minimized at an intermediate value of  $f_p$ .

We next investigate the predator-prey Pearson's correlation coefficient

$$\rho := \lim_{t \rightarrow \infty} \frac{\langle hp \rangle - \langle h \rangle \langle p \rangle}{\sqrt{\langle h^2 \rangle - \langle h \rangle^2} \sqrt{\langle p^2 \rangle - \langle p \rangle^2}}. \quad (30)$$

The moment dynamics (21) results in the following closed-form expression

$$\rho = -\frac{f_p \sqrt{\hat{y}_r + f_h \hat{r}^* - f_p}}{\sqrt{(\hat{y}_r - f_p) f_p^2 + f_h f_p^2 \hat{r}^* + \hat{y}_r (1 + f_h + f_p) \hat{r}^*}} \quad (31)$$

highlighting an interesting result - while a negative dependence of the attack rate ( $f_p < 0$ ) on the predator density leads to positive predator-prey correlations, a positive dependence  $f_p > 0$  leads to negative correlations (Fig. 4). Moreover, predator-prey density fluctuations are predicted to be uncorrelated for a prey-dependent attack rate. To understand this result, one can derive from (18) the following log sensitivities of the equilibrium densities to  $r^*$

$$\frac{r^*}{h^*} \frac{dh^*}{dr^*} = -\frac{f_p}{1 + f_p + f_h}, \quad \frac{r^*}{p^*} \frac{dp^*}{dr^*} = \frac{1 + f_h}{1 + f_p + f_h}. \quad (32)$$

Thus, when  $f_p > 0$ , the prey's equilibrium density decreases with increasing  $r^*$ , while the predator's equilibrium density always increases with  $r^*$ . These opposing responses of equilibrium densities intuitively explain the negative correlation seen for  $f_p > 0$ . In contrast, when  $f_p < 0$ , both equilibrium densities increase with  $r^*$  and manifest in a positive correlation in the stochastic model. Recent work in host-parasitoid discrete-time models with a random host reproduction rate has also identified contrasting correlations depending on the mechanism stabilizing the population dynamics [84].

In summary, we have developed a novel stability criterion for a generalized Lotka-Volterra model with a density-dependent attack rate. (Fig. 1). These result reveal that a Type II functional response can stabilize the equilibrium if combined with mechanisms involving predator inefficiency that puts the system in the black shaded region corresponding to  $f_h < 0$  and  $f_p > 0$ . Moreover, stability arises quite robustly for a Type III functional response when  $f_h > 0$  as long as  $f_p$  is small enough to be in between  $-1 - f_h$  and  $r f_h$ . This stability is also reflected in the stochastic model where density fluctuations monotonically decrease with increasing  $f_h$  for a prey-dependent attack rate (Fig. 2). However, predator-dependent attack rates can amplify stochasticity as  $f_p$  gets close to the stability boundary on either side of the x-axis in Fig. 1. Finally, we have shown that population density correlations may contain signatures on stabilizing mechanisms at play with no correlation in predator-prey densities implying a prey-dependent attack rate (Fig. 4), a negative correlation implying predator cooperation ( $f_p > 0$ ), and a positive correlation implying mutual interference between predators ( $f_p < 0$ ). Future work will expand these results to consider demographic stochasticity by explicitly modeling probabilistic birth-death events. It will also be interestingly to consider competition between two or more consumers, and also look at apparent competition between different prey species attacked by a common predator [85], [86]. Along these lines, new results have recently been developed in the discrete-time framework [46], [87].

## REFERENCES

- [1] A. J. Lotka, *Elements of physical biology*. Williams & Wilkins, 1925.
- [2] V. Volterra, *Variations and fluctuations in the number of individuals in cohabiting animal species*. C. Ferrari, 1927.
- [3] L. Edelstein-Keshet, *Mathematical models in biology*. SIAM, 2005.
- [4] R. May, A. R. McLean, et al., *Theoretical ecology: principles and applications*. Oxford University Press on Demand, 2007.
- [5] M. Begon and C. R. Townsend, *Ecology: from individuals to ecosystems*. John Wiley & Sons, 2020.
- [6] M. S. Bartlett, "On theoretical models for competitive and predatory biological systems," *Biometrika*, vol. 44, no. 1/2, pp. 27–42, 1957.
- [7] R. Arditi and L. R. Ginzburg, *How species interact: altering the standard view on trophic ecology*. Oxford University Press, 2012.
- [8] A. E. Hajek, *Insect parasitoids: attack by aliens*. Cambridge University Press, 2004, p. 145169.
- [9] H. C. J. Godfray, *Parasitoids; Behavioral and Evolutionary Ecology*. 41 William St, Princeton, NJ 08540: Princeton University Press, 1994.
- [10] J. Waage and D. Greathead, *Insect Parasitoids*. Academic Press, 1986.
- [11] M. P. Hassell. New York: Oxford University Press, 2000.



- [12] B. K. Emerick and A. Singh, "The effects of host-feeding on stability of discrete-time host-parasitoid population dynamic models." *Mathematical Biosciences*, vol. 272, pp. 54–63, 2016.
- [13] M. E. Hochberg and A. R. Ives, *Parasitoid population biology*. Princeton University Press, 2000.
- [14] M. A. Jervis, B. A. Hawkin, and N. A. C. Kidd, "The usefulness of destructive host-feeding parasitoids in classical biological control: theory and observation conflict." *Ecological Entomology*, vol. 21, no. 1, pp. 41–46, 1996.
- [15] B. Emerick, A. Singh, and S. R. Chhetri, "Global redistribution and local migration in semi-discrete host-parasitoid population dynamic models." *Mathematical Biosciences*, vol. 327, p. 108409, 2020.
- [16] W. W. Murdoch, C. J. Briggs, and R. M. Nisbet, *Consumer-Resource Dynamics*. Princeton, NJ: Princeton University Press, 2003.
- [17] E. McCauley and W. W. Murdoch, "Cyclic and stable populations: plankton as paradigm." *The American Naturalist*, vol. 129, no. 1, pp. 97–121, 1987.
- [18] J. H. Myers, "Population cycles: generalities, exceptions and remaining mysteries." *Proceedings of the Royal Society B: Biological Sciences*, vol. 285, no. 1875, p. 20172841, 2018.
- [19] M. H. Cortez and J. S. Weitz, "Coevolution can reverse predator-prey cycles." *Proceedings of the National Academy of Sciences*, vol. 111, no. 20, pp. 7486–7491, 2014.
- [20] M. L. Rosenzweig, "Paradox of enrichment: destabilization of exploitation ecosystems in ecological time." *Science*, vol. 171, no. 3969, pp. 385–387, 1971.
- [21] M. L. Rosenzweig and R. H. MacArthur, "Graphical representation and stability conditions of predator-prey interactions." *The American Naturalist*, vol. 97, no. 895, pp. 209–223, 1963.
- [22] T. Tahara, M. K. A. Gavina, T. Kawano, J. M. Tubay, J. F. Rabajante, H. Ito, S. Morita, G. Ichinose, T. Okabe, T. Togashi, *et al.*, "Asymptotic stability of a modified lotka-volterra model with small immigrations." *Scientific reports*, vol. 8, no. 1, p. 7029, 2018.
- [23] V. Křivan, "On the gause predator-prey model with a refuge: A fresh look at the history." *Journal of theoretical biology*, vol. 274, no. 1, pp. 67–73, 2011.
- [24] W. Murdoch, R. Nisbet, E. McCauley, A. DeRoos, and W. Gurney, "Plankton abundance and dynamics across nutrient levels: tests of hypotheses." *Ecology*, vol. 79, no. 4, pp. 1339–1356, 1998.
- [25] M. P. Hassell and H. N. Comins, "Sigmoid functional responses and population stability." *Theoretical Population Biology*, vol. 14, pp. 62–66, 1978.
- [26] M. Aziz-Alaoui and M. D. Okiye, "Boundedness and global stability for a predator-prey model with modified leslie-gower and holling-type ii schemes." *Applied Mathematics Letters*, vol. 16, no. 7, pp. 1069–1075, 2003.
- [27] R. K. Upadhyay, R. D. Parshad, K. Antwi-Fordjour, E. Quansah, and S. Kumari, "Global dynamics of stochastic predator-prey model with mutual interference and prey defense." *Journal of Applied Mathematics and Computing*, vol. 60, no. 1-2, pp. 169–190, 2019.
- [28] F. Sánchez-Garduño, P. Miramontes, and T. T. Marquez-Lago, "Role reversal in a predator-prey interaction." *Royal Society open science*, vol. 1, no. 2, p. 140186, 2014.
- [29] A. E. Larsen, "Modeling multiple nonconsumptive effects in simple food webs: a modified lotka-volterra approach." *Behavioral Ecology*, vol. 23, no. 5, pp. 1115–1125, 2012.
- [30] R. M. May, "Limit cycles in predator-prey communities." *Science*, vol. 177, no. 4052, pp. 900–902, 1972.
- [31] F. Brauer, "Boundedness of solutions of predator-prey systems." *Theoretical Population Biology*, vol. 15, no. 2, pp. 268–273, 1979.
- [32] D. J. Rogers, "Random searching and insect population models." *J. of Animal Ecology*, vol. 41, pp. 369–383, 1972.
- [33] C. S. Holling, "The functional response of predators to prey density and its role in mimicry and population regulation." *The Memoirs of the Entomological Society of Canada*, vol. 97, no. S45, pp. 5–60, 1965.
- [34] F. Barraquand, "Functional responses and predator-prey models: a critique of ratio dependence." *Theoretical ecology*, vol. 7, no. 1, pp. 3–20, 2014.
- [35] J. R. Beddington, "Mutual interference between parasites or predators and its effect on searching efficiency." *The Journal of Animal Ecology*, pp. 331–340, 1975.
- [36] C. Bernstein, "Density dependence and the stability of host-parasitoid systems." *Oikos*, pp. 176–180, 1986.
- [37] C. Free, J. Beddington, and J. Lawton, "On the inadequacy of simple models of mutual interference for parasitism and predation." *The Journal of Animal Ecology*, pp. 543–554, 1977.
- [38] D. Rogers and M. Hassell, "General models for insect parasite and predator searching behaviour: interference." *The Journal of Animal Ecology*, pp. 239–253, 1974.
- [39] J. D. Reeve, J. T. Cronin, and D. R. Strong., "Parasitoid aggregation and the stabilization of a salt marsh host-parasitoid system." *Ecology*, vol. 75, pp. 288–295, 1994.
- [40] P. Rohani, H. C. J. Godfray, and M. P. Hassell, "Aggregation and the dynamics of host-parasitoid systems: A discrete-generation model with within-generation redistribution." *The American Naturalist*, vol. 144, no. 3, pp. 491–509, 1994.
- [41] R. M. May, "Host-parasitoid systems in patchy environments: a phenomenological model." *Journal of Animal Ecology*, vol. 47, pp. 833–844, 1978.
- [42] A. Singh, W. W. Murdoch, and R. M. Nisbet, "Skewed attacks, stability, and host suppression." *Ecology*, vol. 90, no. 6, pp. 1679–1686, 2009.
- [43] A. Singh and R. M. Nisbet, "Semi-discrete host-parasitoid models." *Journal of Theoretical Biology*, vol. 247, no. 4, pp. 733–742, 2007.
- [44] W. S. C. Gurney and R. M. Nisbet, *Ecological Dynamics*. Oxford University Press, 1998.
- [45] G. Ledder, *Mathematics for the life sciences: calculus, modeling, probability, and dynamical systems*. Springer Science & Business Media, 2013.
- [46] A. Singh, "Generalized conditions for coexistence of competing parasitoids on a shared host." *bioRxiv*, 2020.
- [47] A. Singh and B. Emerick, "Hybrid systems framework for modeling host-parasitoid population dynamics." in *2020 59th IEEE Conference on Decision and Control (CDC)*. IEEE, 2020, pp. 4628–4633.
- [48] A. Oaten and W. W. Murdoch, "Functional response and stability in predator-prey systems." *The American Naturalist*, vol. 109, no. 967, pp. 289–298, 1975.
- [49] W. Huang, C. Hauert, and A. Traulsen, "Stochastic game dynamics under demographic fluctuations." *Proceedings of the National Academy of Sciences*, vol. 112, no. 29, pp. 9064–9069, 2015.

- [50] F. C. Klebaner, R. Liptser, *et al.*, “Asymptotic analysis and extinction in a stochastic lotka-volterra model,” *The Annals of Applied Probability*, vol. 11, no. 4, pp. 1263–1291, 2001.
- [51] M. Abundo, “A stochastic model for predator-prey systems: basic properties, stability and computer simulation,” *Journal of Mathematical Biology*, vol. 29, no. 6, pp. 495–511, 1991.
- [52] F. Vadillo, “Comparing stochastic lotka–volterra predator-prey models,” *Applied Mathematics and Computation*, vol. 360, pp. 181–189, 2019.
- [53] U. C. Täuber, “Stochastic population oscillations in spatial predator-prey models,” in *Journal of Physics: Conference Series*, vol. 319, no. 1. IOP Publishing, 2011, p. 012019.
- [54] X. Zou and K. Wang, “Optimal harvesting for a stochastic lotka–volterra predator-prey system with jumps and nonselective harvesting hypothesis,” *Optimal Control Applications and Methods*, vol. 37, no. 4, pp. 641–662, 2016.
- [55] J. Vandermeer, “Seasonal isochronic forcing of lotka volterra equations,” *Progress of Theoretical Physics*, vol. 96, no. 1, pp. 13–28, 1996.
- [56] S. J. Schreiber, M. Benaïm, and K. A. Atchadé, “Persistence in fluctuating environments,” *Journal of Mathematical Biology*, vol. 62, no. 5, pp. 655–683, 2011.
- [57] A. Hening and D. H. Nguyen, “Stochastic lotka–volterra food chains,” *Journal of mathematical biology*, vol. 77, no. 1, pp. 135–163, 2018.
- [58] R. Khasminskii, F. C. Klebaner, *et al.*, “Long term behavior of solutions of the lotka-volterra system under small random perturbations,” *The Annals of Applied Probability*, vol. 11, no. 3, pp. 952–963, 2001.
- [59] M. Suvinthra and K. Balachandran, “Large deviations for the stochastic predator-prey model with nonlinear functional response,” *Journal of Applied Probability*, vol. 54, no. 2, p. 507, 2017.
- [60] J. P. Hespanha and A. Singh, “Stochastic models for chemically reacting systems using polynomial stochastic hybrid systems,” *International Journal of Robust and Nonlinear Control*, vol. 15, pp. 669–689, 2005.
- [61] P. Milner, C. S. Gillespie, and D. J. Wilkinson, “Moment closure approximations for stochastic kinetic models with rational rate laws,” *Mathematical Biosciences*, vol. 231, pp. 99–104, 2011.
- [62] A. Singh and J. P. Hespanha, “Models for multi-specie chemical reactions using polynomial stochastic hybrid systems,” in *Proc. of the 44th IEEE Conf. on Decision and Control, Seville, Spain, 2005*, pp. 2969–2974.
- [63] M. Soltani, C. A. Vargas-Garcia, and A. Singh, “Conditional moment closure schemes for studying stochastic dynamics of genetic circuits,” *IEEE Transactions on Biomedical Systems and Circuits*, vol. 9, pp. 518–526, 2015.
- [64] A. Singh and J. P. Hespanha, “Moment closure techniques for stochastic models in population biology,” in *Proc. of the 2006 Amer. Control Conference, Minneapolis, MN, 2006*.
- [65] D. Schnoerr, G. Sanguinetti, and R. Grima, “Comparison of different moment-closure approximations for stochastic chemical kinetics,” *The Journal of Chemical Physics*, vol. 143, p. 185101, 2015.
- [66] A. Singh and J. P. Hespanha, “Approximate moment dynamics for chemically reacting systems,” *IEEE Transactions on Automatic Control*, vol. 56, pp. 414–418, 2011.
- [67] E. Lakatos, A. Ale, P. D. W. Kirk, and M. P. H. Stumpf, “Multivariate moment closure techniques for stochastic kinetic models,” *The Journal of Chemical Physics*, vol. 143, p. 094107, 2015.
- [68] A. Singh and J. P. Hespanha, “Stochastic hybrid systems for studying biochemical processes,” *Philosophical Transactions of the Royal Society A*, vol. 368, pp. 4995–5011, 2010.
- [69] C. H. Lee, K. Kim, and P. Kim, “A moment closure method for stochastic reaction networks,” *Journal of Chemical Physics*, vol. 130, p. 134107, 2009.
- [70] I. Krishnarajah, A. Cook, G. Marion, and G. Gibson, “Novel moment closure approximations in stochastic epidemics,” *Bulletin of Mathematical Biology*, vol. 67, pp. 855–873, 2005.
- [71] I. Nasell, “Moment closure and the stochastic logistic model,” *Theoretical Population Biology*, vol. 63, pp. 159–168, 2003.
- [72] C. S. Gillespie, “Moment closure approximations for mass-action models,” *IET Systems Biology*, vol. 3, pp. 52–58, 2009.
- [73] T. J. Newman, J.-B. Ferdy, and C. Quince, “Extinction times and moment closure in the stochastic logistic process,” *Journal of Theoretical Biology*, vol. 65, pp. 115–126, 2004.
- [74] P. Smadbeck and Y. N. Kaznessis, “A closure scheme for chemical master equations,” *Proceedings of the National Academy of Sciences*, vol. 110, pp. 14261–14265, 2013.
- [75] M. J. Keeling, “Multiplicative moments and measures of persistence in ecology,” *Journal of Theoretical Biology*, vol. 205, pp. 269–281, 2000.
- [76] A. Singh and J. P. Hespanha, “A derivative matching approach to moment closure for the stochastic logistic model,” *Bulletin of Mathematical Biology*, vol. 69, pp. 1909–1925, 2007.
- [77] K. R. Ghusinga, C. A. Vargas-Garcia, A. Lamperski, and A. Singh, “Exact lower and upper bounds on stationary moments in stochastic biochemical systems,” *Physical biology*, vol. 14, no. 4, p. 04LT01, 2017.
- [78] F. Hayot and C. Jayaprakash, “The linear noise approximation for molecular fluctuations within cells,” *Physical Biology*, vol. 1, pp. 205–210, 2004.
- [79] I. Lestas, J. Paulsson, N. E. Ross, and G. Vinnicombe, “Noise in gene regulatory networks,” *IEEE Transactions on Automatic Control*, vol. 53, no. Special Issue, pp. 189–200, 2008.
- [80] N. Van Kampen, *Stochastic processes in physics and chemistry*. Elsevier, 2011.
- [81] S. Modi, M. Soltani, and A. Singh, “Linear noise approximation for a class of piecewise deterministic markov processes,” in *2018 Annual American Control Conference (ACC)*. IEEE, 2018, pp. 1993–1998.
- [82] A. Singh and R. Grima, “The linear-noise approximation and moment-closure approximations for stochastic chemical kinetics,” *arXiv preprint arXiv:1711.07383*, 2017.
- [83] W. R. Inc., “Mathematica, Version 12.2.” [Online]. Available: <https://www.wolfram.com/mathematica>
- [84] A. Singh, “Fluctuations in population densities inform stability mechanisms in host-parasitoid interactions,” *bioRxiv*, 2020.
- [85] C. Muller and H. Godfray, “Apparent competition between two aphid species,” *Journal of Animal Ecology*, pp. 57–64, 1997.
- [86] R. D. Holt and M. B. Bonsall, “Apparent competition,” *Annual Review of Ecology, Evolution, and Systematics*, vol. 48, pp. 447–471, 2017.
- [87] A. Singh, “Population dynamics of multi-host communities attacked by a common parasitoid,” *bioRxiv*, pp. 2021–01, 2021.
